# Supplementary material for: Xenopus Oocytes: A Tool to Decipher Molecular Specificity of Insecticides towards Mammalian and Insect GABA—A Receptors
Source: MDPI journal article supplement (doi:10.3390/membranes12050440), 2022-04-19
Supplement: s1 [file s1]

**Supplementary Table S1.** Pharmacological parameters of insect and human GABA receptors.

| Protein (Accnb)                                   | GABA                  |                | fipronil              | picotoxin             |
|---------------------------------------------------|-----------------------|----------------|-----------------------|-----------------------|
|                                                   | EC <sub>50</sub> (μM) | p              | IC <sub>50</sub> (μM) | IC <sub>50</sub> (μM) |
| <i>A. pisum</i> RDL1                              | 23.8 ± 2.5(20)        | 2.4 ± 0.3 (20) | 0.31 ± 0.11(19)       | 0.7 ± 0.2 (12)        |
| <i>A. pisum</i> RDL1 <sup>ad*</sup> AXY92182.1    | 23 ± 1.7              | 1.6 ± 0.1      | 0.64 ± 0.15           | ND                    |
| <i>A. pisum</i> RDL1 <sup>bd*</sup>               | 51 ± 9.1              | 2.0 ± 0.3      | 0.18 ± 0.06           | ND                    |
| <i>A. pisum</i> RDL2 <sup>b*</sup> AXY92183.1     | 28 ± 5.4              | 1.0 ± 0.1      | 0.72 ± 0.19           | ND                    |
| <i>A. mellifera</i> RDLAJE68941.1                 | 19.3 ± 3.5(13)        | 2.1 ± 0.2 (13) | 0.07 ± 0.2(9)         | 0.6 ± 0.1(15)         |
| <i>V. destructor</i> RDL1 <sup>#</sup> AVY53069.1 | 269 ± 41 (10)         | 2.3 ± 0.2 (10) | >500μM                | >500μM                |
| <i>V. destructor</i> RDL2 <sup>#</sup> AYR04938.1 | 14.8 ± 1.4 (13)       | 1.8 ± 0.2 (13) | 0.77 ± 0.25(11)       | 0.7 ± 0.5 (14)        |
| <i>V. destructor</i> RDL3 <sup>#</sup> AVY53071.1 | 43.1 ± 10.4 (9)       | 2.3 ± 0.1 (9)  | 3.64 ± 1.74(5)        | 0.6 ± 0.1 (10)        |
| <i>H. sapiens</i> α2β2γ2 <sup>&amp;</sup>         | 27.4 ± 4.4(10)        | 1.4 ± 0.1 (10) | 1.88 ± 0.39(9)        | 1.2 ± 0.1 (4)         |
| <i>H. sapiens</i> α4β2γ2 <sup>&amp;</sup>         | 6.9 ± 2.1(21)         | 1.4 ± 0.2 (21) | ND                    | 1.6 ± 0.2 (4)         |

\* : see (8) for results ; #and &see (7) and (14) for partial characterization.
